# Supplementary material for: Synthesis and Biological Properties of Caffeic Acid-PNA Dimers Containing Guanine
Source: PubMed Central journal article supplement (PMC6270098; doi:10.3390/molecules18089147), 2013-07-31
Supplement: molecules-18-09147-s001.pdf [file molecules-18-09147-s001.pdf]

# Supplementary Materials

**Figure S1.** MALDI-MS spectrum of crude compound 1.

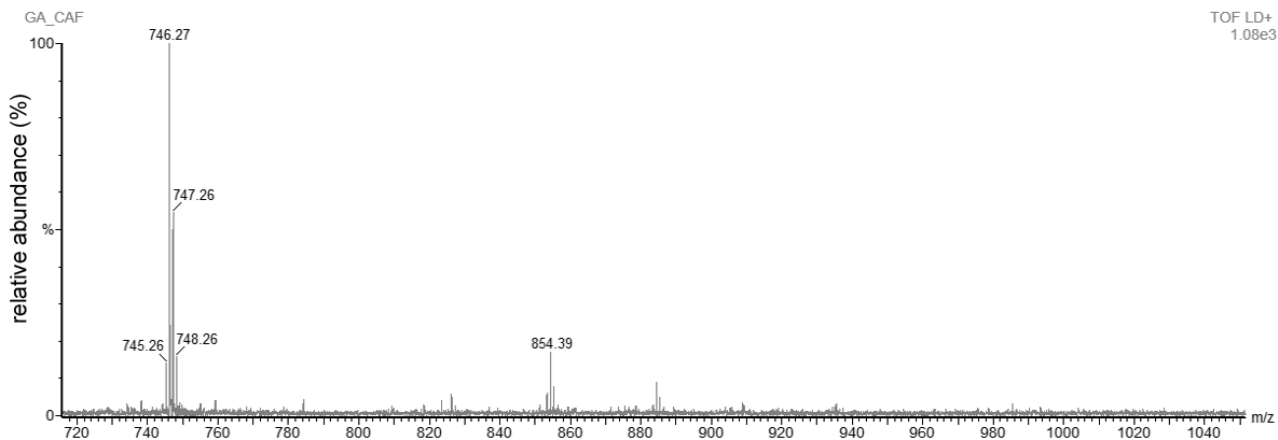

**Table S1.** DPPH, ABTS and TBARS  $IC_{50}$  values of the inhibitor series.  $IC_{50}$  values, defined as the compound amount causing 50 per cent activity inhibition, was determined from the plotted curves.

|              | <b>DPPH <math>IC_{50}</math></b> | <b>ABTS <math>IC_{50}</math></b> | <b>TBARS <math>IC_{50}</math></b> |
|--------------|----------------------------------|----------------------------------|-----------------------------------|
| Caffeic Acid | 10.97                            | 2.95                             | 21.79                             |
| AG           | 51.36                            | 13.91                            | 41.38                             |
| CG           | 78.03                            | 13.04                            | 49.0                              |
| GA           | >100                             | >100                             | 85.34                             |
| GG           | >100                             | 36.74                            | 94.36                             |
| GC           | >100                             | 19.98                            | 47.69                             |
| GT           | >100                             | >100                             | >100                              |
| TG           | >100                             | >100                             | 40.92                             |
